# Supplementary material for: Comprehensive Analysis of Prokaryotes in Environmental Water Using DNA Microarray Analysis and Whole Genome Amplification
Source: PubMed Central journal article supplement (PMC4235703; doi:10.3390/pathogens2040591), 2013-10-30

Table S2. Most frequently detected species in each sample.

| Nemuro                               | Tonegawa river                           | Shimane-kaka                          | Hachijo                               | Kagoshima                                     | Ikeda lake                                        | Yoron                                    |
|--------------------------------------|------------------------------------------|---------------------------------------|---------------------------------------|-----------------------------------------------|---------------------------------------------------|------------------------------------------|
| <i>Enterococcus faecium</i>          | <i>Enterococcus faecium</i>              | <i>Lactobacillus fermentum</i>        | <i>Bacillus</i> sp. TB1               | <i>Streptomyces</i> sp. 334F01                | <i>Rhizobium tropici</i>                          | <i>Staphylococcus</i> sp. RCTIC-P62      |
| <i>Streptomyces</i> sp. 334F01       | <i>Rhizobium</i> sp. STM 4O41            | <i>Bacillus</i> sp. th2               | <i>Bacillus firmus</i>                | <i>Bacillus thuringiensis</i>                 | <i>Firmicutes</i> bacterium MMD12                 | <i>Bacillus</i> sp. J357                 |
| <i>Bradyrhizobium lupini</i>         | soil bacterium T8                        | <i>Rhizobium</i> sp. STM 4O41         | <i>Lactobacillus sanfranciscensis</i> | <i>Lactobacillus sanfranciscensis</i>         | <i>Helicobacter</i> sp. WB1F                      | <i>Lactobacillus fermentum</i>           |
| <i>Bacillus firmus</i>               | <i>Streptomyces</i> sp. 334F01           | freshwater bacterium FO-121           | <i>Lactobacillus plantarum</i>        | <i>Rhizobium</i> sp. STM 4O41                 | Gram-negative bacterium cL-10-26                  | <i>Sphingobacterium multivorum</i>       |
| <i>Bacillus thuringiensis</i>        | <i>Sphingomonas jaspisi</i>              | <i>Pantoea</i> sp. BD 309             | <i>Rubrobacter xylanophilus</i>       | <i>Erythrobacter</i> sp. JL990                | <i>Bacillus</i> sp. th2                           | Elbe River snow isolate IsoC2            |
| <i>Rhizobium</i> sp. STM 4O41        | <i>Curtobacterium albidum</i>            | <i>Bacillus</i> sp. J357              | <i>Bradyrhizobium lupini</i>          | <i>Sphingomonas paucimobilis</i>              | <i>Lactobacillus fermentum</i>                    | bacterium UASWS0091                      |
| Sandal spike phytolasma              | <i>Curtobacterium albidum</i>            | <i>Sphingobacterium multivorum</i>    | <i>Staphylococcus</i> sp. ARCTIC-P62  | <i>Enterococcus faecium</i>                   | <i>Treponema</i> sp. 1:4:292                      | <i>Helicobacter pylori</i>               |
| soil bacterium T8                    | <i>Lactobacillus sanfranciscensis</i>    | <i>Lactobacillus sanfranciscensis</i> | <i>Curtobacterium albidum</i>         | soil bacterium T8                             | soil bacterium T8                                 | <i>Rhizobium tropici</i>                 |
| <i>Sphingomonas jaspisi</i>          | <i>Bacillus</i> sp. TB1                  | <i>Enterococcus faecium</i>           | <i>Rhizobium</i> sp. STM 4O41         | <i>Rubrobacter xylanophilus</i>               | <i>Pantoea</i> sp. BD 309                         | freshwater bacterium FO-121              |
| <i>Curtobacterium albidum</i>        | <i>Erythrobacter</i> sp. AS-25           | <i>Rhizobium</i> sp. STM 4O44         | <i>Acinetobacter</i> sp. BR-12        | <i>Brachybacterium paraconglomeratum</i>      | <i>Pseudomonas</i> sp. ps11-30                    | <i>Streptomyces</i> sp. 334F01           |
| <i>Staphylococcus</i> sp. ARCTIC-P62 | <i>Natranaerobius thermophilus</i>       | <i>Rhizobium tropici</i>              | <i>Rhizobium tropici</i>              | <i>Streptomyces</i> sp. JXNT-A-22             | <i>Brucella</i> sp. CGL-1                         | <i>Enterococcus faecium</i>              |
| <i>Bacillus</i> sp. TB1              | <i>Rhizobium tropici</i>                 | <i>Helicobacter</i> sp. WB1F          | <i>Streptomyces</i> sp. 334F01        | <i>Bacillus pumilus</i>                       | <i>Candidatus</i> <i>Midichloria mitochondrii</i> | <i>Brachybacterium paraconglomeratum</i> |
| freshwater bacterium FO-121          | Sandal spike phytolasma                  | <i>Acinetobacter</i> sp. BR-12        | <i>Sphingomonas jaspisi</i>           | <i>Candidatus</i> <i>Phytoplasma</i> AZ04-1-5 | freshwater bacterium FO-121                       | <i>Klebsiella</i> sp. MSI78              |
| <i>Bacillus</i> sp. th2              | <i>Rhodococcus</i> sp.                   | <i>Natranaerobius thermophilus</i>    | freshwater bacterium FO-121           | <i>Holospira obtusa</i>                       | bacterium UASWS0091                               | <i>Rhizobium</i> sp. M061122-8           |
| <i>Paenibacillus</i> sp. SKU 11      | <i>Bacillus</i> sp. th2                  | <i>Streptomyces</i> sp. 334F01        | gamma proteobacterium RBE2CD-47       | <i>Pseudomonas</i> sp. R-35697                | <i>Psychrobacter pulmonis</i>                     | soil bacterium T8                        |
| <i>Bacillus</i> sp. J357             | <i>Lactobacillus plantarum</i>           | <i>Staphylococcus</i> sp. ARCTIC-P62  | <i>Erythrobacter</i> sp. JL990        | <i>Bacillus</i> sp. TB1                       | <i>Acinetobacter</i> sp. BR-12                    | <i>Pseudomonas</i> sp. R-35697           |
| <i>Pantoea</i> sp. BD 309            | <i>Lactobacillus fermentum</i>           | gamma proteobacterium AE060401_3      | <i>Bacillus</i> sp. J357              | <i>Pseudoalteromonas</i> sp. ST061013-057     | <i>Rhizobium</i> sp. STM 4O44                     | Sandal spike phytolasma                  |
| <i>Pseudomonas</i> sp. MT27          | <i>Psychrobacter pulmonis</i>            | <i>Lactobacillus plantarum</i>        | <i>Pseudomonas</i> sp. R-35697        | <i>Rhodocista xerospirillum</i>               | <i>Lactobacillus sanfranciscensis</i>             | <i>Sphingomonas paucimobilis</i>         |
| <i>Rhizobium tropici</i>             | <i>Brachybacterium paraconglomeratum</i> | <i>Clostridium perfringens</i>        | <i>Bacillus</i> sp. th2               | <i>Rhodococcus</i> sp.                        | <i>Streptomyces</i> sp. 334F01                    | <i>Mycobacterium</i> sp. SSRW25-5        |

**Table S3.** Labeling primers for 16S rRNA microarray.

|              | 16S rRNA position <sup>a</sup> | Strand  | Sequence   |
|--------------|--------------------------------|---------|------------|
| Cy3-labeling | 355                            | Reverse | GCTGCCTCCC |
|              | 519                            |         | ATTACCGCGG |
|              | 1393                           |         | TACAAGACCC |
|              | 1458                           |         | TTGTTACGAC |
| Non-labeling | 35                             | Forward | ATCCTGGCTC |
|              | 778                            |         | TCCACGCTGT |
|              | 972                            |         | CGAAGAACCT |

<sup>a</sup> Positions are referenced against the *E. coli* 16S rRNA sequence.

**Figure S1.** Microarray data classified at the class, order, family, genus and species levels. Distribution was illustrated by different colors, but not names.

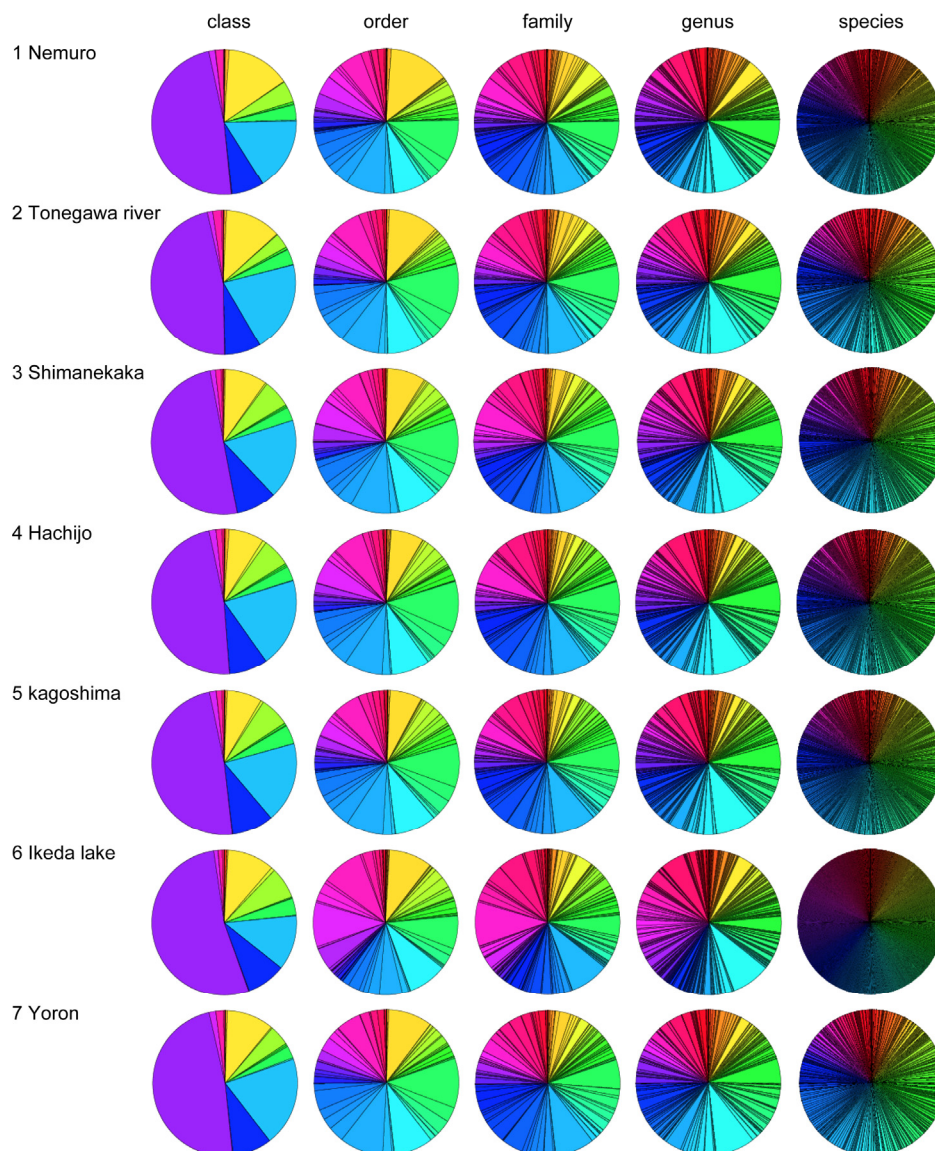

**Figure S2.** Variable regions and labeling primer sites in 16S rRNA. Three unlabeled forward primers and four Cy3-labeled reverse primers covering 16S rRNA variable region one to nine were used to label the sample sequences. Cy3 was labeled at the 5' end of the reverse primers, which are the reverse strand against the array probes.

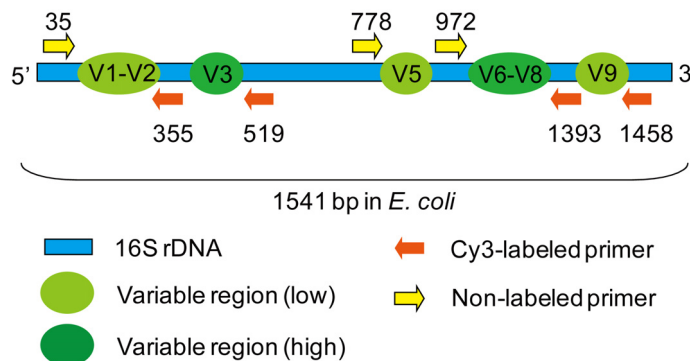

**Figure S3.** (a) Histogram of original signal intensities; (b) corrected intensities after background subtraction [39]. Two independent data sets from duplicate probes completely overlapped in the graph, verifying the high reproducibility of this array. Although original signal intensities were variable in low intensities, most weak signals came very close to zero after background subtraction.

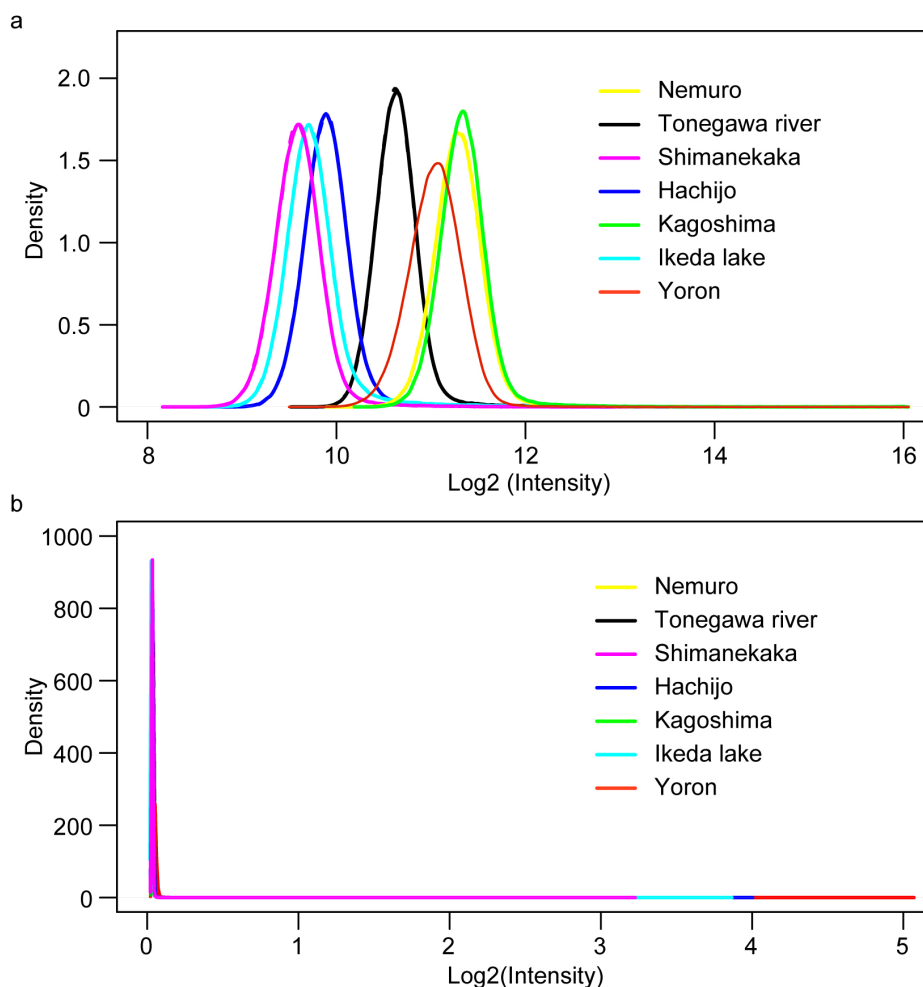

**Figure S4.** MA plot of each sample before and after background correction. Two sets of data from duplicate probes were treated as independent data sets. After correction, intensities of most probes came close to zero. Loess curve became almost a straight line ( $M = 0$ ). All the interquartile range (IQR) became small.

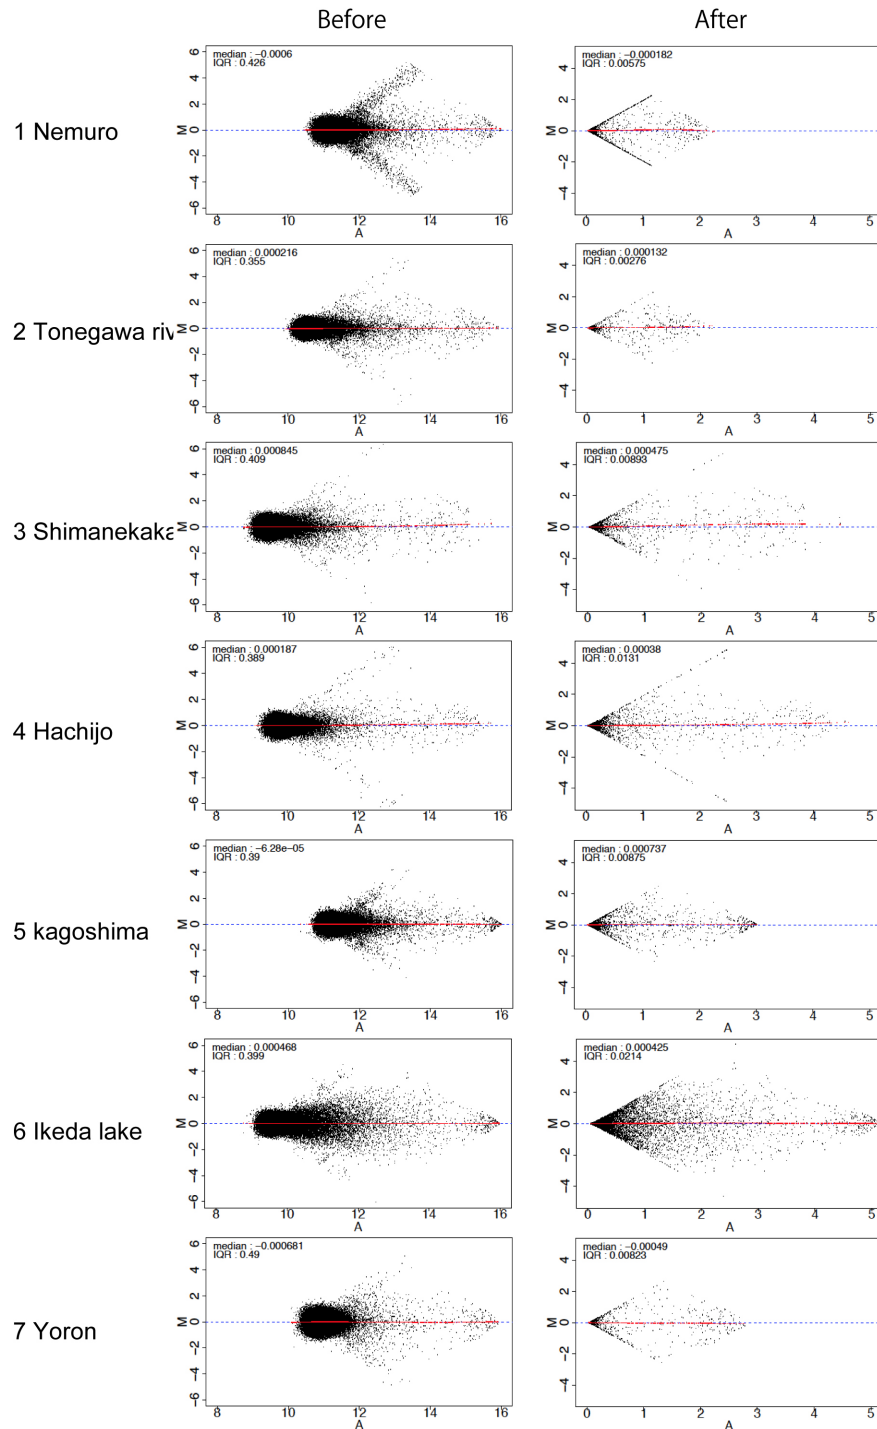

**Figure S5.** Histogram of positive signal intensities obtained with the microarray after normalization. Signal intensities shown as  $2^n$  on x-axis and probe number shown as  $10^n$  on y-axis were plotted. Dashed line shows position of the sequence with the 1,000th strongest signals in each sample.

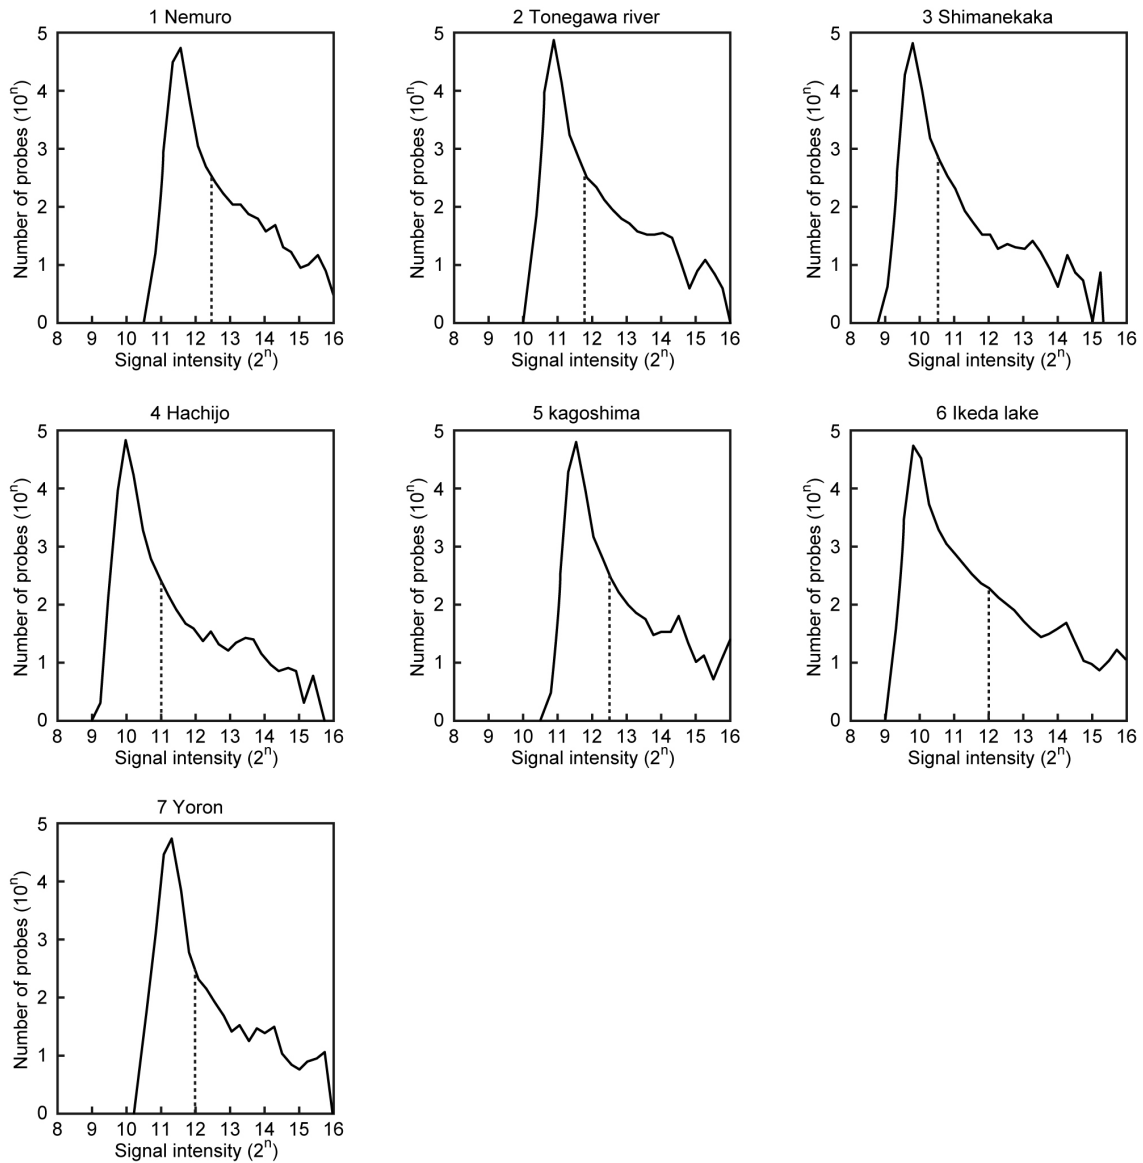

Supplement: pathogens-02-00591-s001.pdf [file pathogens-02-00591-s001.pdf]
